# Research Article

1  
2  
3  
4  
5  
6  
7  
8  
9  
10  
11  
12  
13  
14  
15  
16  
17  
18  
19  
20  
21  
22  
23  
24  
25  
26  
27  
28  
29  
30  
31  
32  
33  
34  
35  
36

## Study Title:

Prevalence and determinants of non-communicable diseases risk factors among reproductive-aged women of Bangladesh: Evidence from Bangladesh Demographic Health Survey 2017-2018

## Short Title:

Prevalence and determinants of non-communicable diseases risk factors among reproductive-aged women of Bangladesh

## Authors' Name:

Saifur Rahman Chowdhury<sup>1,\*</sup>, Md Nazrul Islam<sup>1</sup>, Tasbeen Akhtar Sheekha<sup>2</sup>, Shirmin Bintay Kader<sup>2</sup>, Ahmed Hossain<sup>1,3,4</sup>

## Authors' Affiliations:

- <sup>1</sup> Department of Public Health, North South University, Dhaka-1229, Bangladesh
- <sup>2</sup> Department of Community Health and Epidemiology, College of Medicine, University of Saskatchewan, Saskatoon, SK, S7N 5E5, Canada
- <sup>3</sup> NSU Global Health Institute (NGHI), Dhaka-1229, Bangladesh
- <sup>4</sup> College of Health Science (CHS), University of Sharjah, United Arab Emirates (UAE)

## \*Corresponding Author:

Name : Saifur Rahman Chowdhury  
Email : [chowdhury.saifurrahman@northsouth.edu](mailto:chowdhury.saifurrahman@northsouth.edu)  
Address : Department Department of Public Health, North South University, Dhaka-1229, Bangladesh  
ORCID : <http://orcid.org/0000-0003-4361-0792>

## Authors' Email:

Saifur Rahman Chowdhury : [chowdhury.saifurrahman@northsouth.edu](mailto:chowdhury.saifurrahman@northsouth.edu)  
Md Nazrul Islam : [nazrul.i@usask.ca](mailto:nazrul.i@usask.ca)  
Tasbeen Akhtar Sheekha : [uno401@mail.usask.ca](mailto:uno401@mail.usask.ca)  
Shirmin Bintay Kader : [shirmin.kader@usask.ca](mailto:shirmin.kader@usask.ca)  
Ahmed Hossain : [ahmed.hossain@northsouth.edu](mailto:ahmed.hossain@northsouth.edu)

## 37 **Abstract**

### 38 **Introduction**

39 Knowing the risk factors like hypertension, overweight/obesity, and smoking status among women  
40 of reproductive age could allow the development of an effective strategy for reducing the burden  
41 of non-communicable diseases (NCD). We sought to determine the prevalence and  
42 determinants of NCD risk factors among Bangladeshi women of reproductive age.

### 43 **Methods**

44 This study utilized the Bangladesh Demographic and Health Survey (BDHS) data from 2017-2018  
45 and analyzed 5,624 women of reproductive age. This nationally representative cross-sectional  
46 survey utilized a stratified, two-stage sample of households. Mixed-effects Poisson regression  
47 models were fitted to find the adjusted prevalence ratio for smoking, overweight and obesity, and  
48 hypertension.

### 49 **Results**

50 The average age of 5,624 participants was 31 years (SD=9.07). The prevalence of smoking,  
51 overweight/obesity, and hypertension was 9.55%, 31.57%, and 20.27%, respectively. More than  
52 one-third of the participants (34.55%) had one NCD risk factor, and 12.51% of participants had  
53 two NCD risk factors. Women between 40–49 years had more NCD risk factors than 18–29 years  
54 aged women (APR: 2.44; 95% CI: 2.22-2.68). Women with no education (APR: 1.15; 95% CI:  
55 1.00-1.33), married (APR: 2.32; 95% CI: 1.78–3.04), and widowed/divorced (APR: 2.14; 95% CI:  
56 1.59–2.89) were more prevalent in NCD risk factors. Individuals in the Barishal (APR: 1.44; 95%  
57 CI: 1.28–1.63) division were living with higher risk factors for NCD. Women who belonged to the  
58 richest (APR: 1.82; 95% CI: 1.60–2.07) wealth quintile were more likely to have the risk factors of  
59 NCD.

## 60 **Conclusions**

61 This study revealed that older women, currently married and widowed/divorced women, women  
62 from the wealthiest socio-economic group, and women with a lower level of education were more  
63 likely to have NCD risk factors. Furthermore, there was a significant relationship between the  
64 geographical division and NCD risk factors. To reduce the future prevalence of NCD, it is  
65 necessary to implement effective prevention and control programs that target women with a  
66 higher risk of having the disease.

67 **Keywords:** non-communicable diseases; risk factors; reproductive-aged women; BDHS;  
68 Bangladesh.

69

70

71

72

73

74

75

76

77

## 78 Introduction

79 The major cause of global death and disability is non-communicable diseases (NCD) [1,2]. The  
80 most common NCD are cardiovascular diseases (CVD), cancer, chronic respiratory diseases,  
81 and diabetes [2]. Every year an estimated 85% of 15 million premature deaths occur due to NCD  
82 in low- and middle-income countries (LMICs) worldwide [2], and almost 80% of the deaths occur  
83 due to the above-mentioned NCD [2]. Between 2012 and 2030, the number of deaths due to NCD  
84 is predicted to reach 52 million from 38 million globally [3].

85 In Bangladesh, NCD are significant cause of mortality, responsible for 67% of total deaths [4].  
86 The prevalence of NCD has increased over the last ten years, and it is predicted to increase more  
87 as Bangladesh is passing through a growing stage of epidemiological transition [1,5–7].  
88 Bangladesh is a lower-middle-income country having over 170 million people [8]. It surfaced as a  
89 developing country with an experience of rapid growth in economy and urbanization in the  
90 previous decades [8]. As a result of this substantial development, there is a large number of  
91 people are leading a more sedentary lifestyle influenced by the change in dietary habits, increased  
92 supply and demand for unhealthy processed food, and physical inactivity followed by irregularities  
93 in mealtimes, smoking, and alcohol consumption [7–10]. Moreover, there are metabolic risk  
94 factors that contribute to the development of NCD. The most common metabolic risk factors are  
95 obesity, high blood sugar, high blood pressure, and increased cholesterol [6]. There is an  
96 increased chance of developing NCD when two or more of these factors combine, referred to as  
97 clustering of risk factors [11]. Consequently, a considerable proportion of the population suffered  
98 from overweight (29.4%) [12], hypertension (26.2%) [13], and diabetes (9.2%) [14] in Bangladesh.

99 Women are at an increased risk of developing NCD as they mostly experience a combination of  
100 multiple behavioral and metabolic risk factors [15,16]. Globally, NCD are responsible for 65% of  
101 premature death in women, with the majority of death occurring in LMICs [17]. Evidence showed

102 that between 1992 and 2015, the prevalence of diabetes has a threefold to fourfold increase, with  
103 a prediction to reach around 24% in men and 33.5% in women by 2030, with higher odds of  
104 multimorbidity than men [18]. The reason behind this is that women having low socio-economic  
105 conditions than men causing gender inequality which affects health outcomes [19]. The fetal  
106 health and the reproductive health of women become severely affected by the NCD risk factors  
107 [20,21]. For example, hypertension in pregnancy increases menstrual problems, complications in  
108 pre- and post-natal periods, and maternal mortality [22]. Moreover, previous research showed  
109 that women were more likely to be overweight in urban areas because of rapid urbanization,  
110 whereas they were more likely to be underweight in rural areas because of inadequate provision  
111 of healthy food [23]. Lack of proper nutrition may lead to serious metabolic changes contributing  
112 to the development of heart disease, hypertension, and diabetes among them as well as among  
113 their future generation [9]. In addition, obesity is related to polycystic ovary syndrome (PCOS)  
114 [24], and hypertension is the common cause of higher maternal mortality and stillbirth [22].  
115 However, women are less likely to be identified or treated as they demonstrate fewer signs and  
116 symptoms of NCD, for instance, CVD, compared to men and get a lack of attention in case of  
117 disease prevention strategies [25].

118 Although Bangladesh has been successful in achieving several Sustainable Development Goals  
119 (SDG), the government and many international organizations are still working to decrease the  
120 burden of NCD as these are considered a challenge in the field of public health. It is evident that  
121 to prevent and control NCD, the socio-demographic determinants of major NCD risk factors and  
122 their clustering should be explored and understood in a systematic way. There are many studies  
123 that focused on the prevalence and risk factors of NCDs [1,5–7,10,11], in addition to diabetes,  
124 hypertension [1,13,14], overweight and obesity [12]. Though a large number of studies were  
125 nationally representative studies and few studies used earlier data or focused on a specific  
126 geographic region, studies on the women of reproductive age addressing the overall social

127 determinants and prevalence of risk factors of NCD were very rare. This study, therefore, aimed  
128 to investigate the prevalence of risk factors of NCD and determine their socio-demographic  
129 distributions among Bangladeshi reproductive-aged women.

## 130 **Materials and Methods**

### 131 **Study population and data source**

132 This study used the data from the latest Bangladesh Demographic and Health Survey (BDHS)  
133 2017-2018 to explore the prevalence of non-communicable disease risk factors among  
134 reproductive-aged women. The BDHS is a nationally representative cross-sectional survey and  
135 covers the entire population residing in non-institutional dwelling units in the country. The BDHS  
136 survey was performed using a stratified, two-stage household sample. In the first step, 675  
137 enumeration areas (EAs) (250 in urban areas and 425 in rural areas) were picked with a  
138 probability proportional to the size of the EA. In the second round of sampling, an average of 30  
139 households per EA were gathered independently from urban and rural areas and from each of  
140 the eight divisions in order to obtain statistically reliable estimates of key demographic and health  
141 factors for the entire country. Detailed survey sampling and the data collection procedure have  
142 been published in the BDHS survey report [26]. On the survey, 20,250 households were selected,  
143 interviews were completed in 19,457 households with an overall 96.5% household response rate,  
144 and information was recorded from 89,819 household members [26]. Finally, this study only  
145 included 5,624 reproductive-aged women (age 18-49 years) who had their blood pressure, height  
146 and weight, and smoking status recorded.

**Fig 1. Schematic representation of the sampling procedure of the Bangladesh Demographic and Health Survey, 2017–2018**

147  
148  
149

## 150 **Outcome variables**

151 The outcome variables for this research were the three risk factors for non-communicable  
152 diseases, which are smoking, overweight and obesity, and hypertension. These three selected  
153 NCD risk factors are available in the BDHS 2017-2018 survey data set.

154 **Smoking:** In the BDHS survey, participants' current smoking status was recorded as a  
155 dichotomous response.

156 **Overweight and obesity:** Height and weight measures were collected for respondents in all of  
157 the households sampled. Weight measurements were obtained using an electronic scale (model  
158 number SECA 878U) with a digital screen, and height measurements were carried out with a  
159 measuring board (ShorrBoard). The health technician and one female technician were deployed  
160 to take both measurements. Women who were pregnant on the day of the survey visit or had  
161 given birth during the preceding two months were excluded. Body mass index (BMI) was  
162 calculated by dividing weight in kilograms by height in meters squared ( $\text{kg}/\text{m}^2$ ). The overweight  
163 was considered for the individual with BMI between 25.0 and 29.9, and obese was BMI greater  
164 than or equal to 30.0 [26].

165 **Hypertension:** Blood pressure was measured for all participants aged 18 and above in the  
166 subsample of one-fourth of the households. All participants who qualified for blood pressure  
167 measures were contacted and instructed on the procedure. Those who gave their consent were  
168 measured for their blood pressure. The automatic device includes separate cuffs BP monitor was  
169 used to measuring the blood pressure. Three blood pressure measurements were taken at  
170 intervals of approximately 10 minutes. Typically, the average of the second and third  
171 measurements was utilized to reflect the blood pressure results of respondents. Individuals were  
172 diagnosed having hypertension if they had an average systolic blood pressure level of 140 mmHg

173 or above, and diastolic blood pressure level of 90 mmHg or above, or they were taking  
174 antihypertensive medication at the time of the survey [27,28].

## 175 **Explanatory variables**

176 This study considered the socio-demographic covariates related to smoking, overweight/obesity,  
177 and hypertension. These included the respondents' ages (18–29, 30–39, and 40–49 years),  
178 education (no education, primary, secondary, and higher-level), marital status (married, never  
179 married, and widowed/divorced), residence (rural, urban), geographical areas (Barishal,  
180 Chittagong, Dhaka, Khulna, Mymensingh, Rajshahi, Rangpur, and Sylhet divisions), occupational  
181 status (not working, service, agriculture/self-employed, and manual), wealth index (poorest,  
182 poorer, middle, richer and richest). The wealth index of the households was calculated by the  
183 principal component analysis. The scores were given based on available consumer goods in the  
184 household (television, bicycle, car, etc.), and household characteristics (source of drinking water,  
185 sanitation facilities, flooring materials, etc.). Then the national wealth quintiles were compiled by  
186 assigning the household score to each usual household member, ranking each person in the  
187 household population by her/his score, and then dividing the distribution into five equal categories,  
188 each comprising 20% of the population [26].

## 189 **Data analysis**

190 The socio-demographic characteristics of the respondents were reported in mean and weighted  
191 percentages. The crude prevalence of smoking, overweight and obesity, and hypertension was  
192 determined after accounting for the complex survey design and survey sampling weights.  
193 Differences between categorical variables were tested using the chi-square tests. We applied  
194 mixed-effects Poisson regression models with robust variance to identify factors linked with non-  
195 communicable diseases risk factors and reported the results as adjusted prevalence ratio (APR)  
196 with a 95% confidence interval (CI). We used this model since the odds ratio estimated using



197 logistic regression from a cross-sectional study may significantly overestimate relative risk when  
198 the outcome is common [29,30]. Secondly, in the case of convergence failure with the log-  
199 binomial model, Poisson regression with a robust variance performs better in estimating the  
200 prevalence ratio from a cross-sectional study [31]. Finally, the number of risk factors present  
201 within each participant (from 0 to 3) was counted to assess the clustering of risk factors and  
202 analyzed using the mixed-effects Poisson regression. All statistical tests were two-tailed, and a  
203 p-value of <0.05 was regarded as statistically significant. Statistical software STATA-16 (Stata  
204 Corp LP, College Station, TX, USA) was used to conduct the analysis.

## 205 **Ethical considerations**

206 This study used secondary data from the country representative survey (BDHS 2017-2018). The  
207 study protocol for BDHS was approved by the ICF (international institutional review board), and  
208 the data is publicly available (<http://dhsprogram.com/data/available-datasets.cfm>). Therefore, no  
209 further ethical approval was necessary for this study. However, we received authorization from  
210 the DHS to use the datasets. Informed consent was obtained from each participant of the survey  
211 before enrolling in the survey by using the Introduction and Consent form of the survey. It was  
212 also explained that the information will be kept strictly confidential and will not be shared with  
213 anyone except with the members of the survey team.

## 214 **Results**

### 215 **Socio-demographic characteristics of study participants**

216 The socio-demographic characteristics of the study participants (n=5,624) are shown in **Table 1**.  
217 The mean age of research participants was 31 years (SD=9.07). Approximately half (48.26%) of  
218 them were between 18 and 29 years old. In terms of educational attainment, 17.78% of the  
219 participants did not have any formal education. On the other hand, only 14.67% of respondents  
220 have education above the secondary level. In this study, 88.22% of respondents were married.

221 More than two-thirds (71.84%) of the participants resided in rural areas. However, about one-  
222 quarter (24.44%) of the participants came from the Dhaka division, which is the capital city of  
223 Bangladesh. The richest comprised 22.02% of the total participants based on the wealth index.  
224 Surprisingly, the proportions of participants in between the poorest and richer quintiles were  
225 almost identical. More than half (54.38%) of the participants were not involved in any formal work.

**Table 1. Socio-demographic characteristics of participants**

226

## 227 **Prevalence of non-communicable diseases risk factors** 228 **among reproductive-aged women**

229 **Table 2** depicts the prevalence of risk factors for non-communicable diseases among  
230 reproductive-aged women. The prevalence of smoking was 9.55% among the study participants.  
231 Smoking was more prevalent among the age group 40-49 years (19.26%), women with no  
232 educational status (19.69%), Sylhet division residents (21.69%), participants with the poorest  
233 wealth index (14.04%), and the agriculture/self-employed women (14.49%) ( $p < 0.001$ ). Compared  
234 to other risk factors, overweight and obesity were profound among the participants (31.57%).  
235 About 40.26% of the participants between 30-39 years were either overweight or obese ( $p$   
236  $< 0.001$ ). Likewise, overweight and obesity were more prevalent among married (33.36%), urban  
237 residents (40.18%), Chattogram division residents (36.26%), the richest (52.31%), and service  
238 holders (35.18%) ( $p < 0.001$ ). In this study, 20.27% of women were suffering from hypertension.  
239 Women aged 40 to 49 had the highest prevalence of hypertension (39.21%) ( $p < 0.001$ ). In  
240 addition, the prevalence of hypertension was higher among women who were uneducated  
241 (29.07%), and divorced/widowed (25.70%) ( $p < 0.001$ ).

**Table 2. Prevalence of non-communicable diseases risk factors among reproductive-aged women**

242

243 Furthermore, the research determined the prevalence of NCD risk factors by the number of factors  
244 across different age groups (**Fig. 2**). More than one-third of the participants had one NCD risk  
245 factor, and 12.51% of participants had two NCD risk factors.

**Fig. 2. Prevalence of number of non-communicable diseases risk factors among reproductive-aged women**

246

## 247 **Association between socio-demographic characteristics and** 248 **non-communicable diseases risks factors**

249 According to **Table 3**, the mixed-effects Poisson regression model revealed the adjusted  
250 association between socio-demographic characteristics and non-communicable diseases risk  
251 factors. The participants' age was strongly associated with the risk factors for non-communicable  
252 diseases. Compared to participants aged 18-29 years, those aged 30-39 years (APR: 1.83; 95%  
253 CI: 1.45-2.30) and 40-49 years (APR: 2.65; 95% CI: 2.07-3.38) were more likely to be smokers.  
254 The prevalence ratio for overweight and obesity in the age group 30-39 years (APR: 1.71; 95%  
255 CI: 1.55-1.89) and 40-49 years (APR: 1.77; 95% CI: 1.57-1.98) were significantly higher than the  
256 age group 18-29 years. Similarly, the prevalence of hypertension was significantly higher in the  
257 30-39 years (APR: 2.58; 95% CI: 2.18-3.05) and 40-49 years (APR: 3.94; 95% CI: 3.34-4.69) age  
258 groups compared to the younger age group. The prevalence ratio of smoking was almost 3 times  
259 higher among participants with no education (APR: 3.19; 95% CI: 1.85-5.49) compared to those  
260 with a higher level of education. Married women (APR: 2.71; 95% CI: 1.96-3.75) and  
261 widowed/divorced women (APR: 2.16; 95% CI: 1.49-3.15) demonstrated a higher prevalence of  
262 overweight and obesity compared to the never-married women.

263 For current smoking, prevalence ratio of the participants from Barishal (APR: 2.81; 95% CI: 2.04-  
264 3.86), Mymensingh (APR: 2.06; 95% CI: 1.47-2.90), and Sylhet (APR: 3.07; 95% CI: 2.26-4.16)  
265 was comparatively higher than the participants from Dhaka, the capital of Bangladesh. However,

266 hypertension was almost 1.5 times higher among the participants from Barishal, Chattogram, and  
267 Rangpur than the participants from Dhaka. In addition, individuals with hypertension (APR: 1.51;  
268 95% CI: 1.22-1.87), overweight and obesity (APR: 2.88; 95% CI: 2.39-3.47) were more likely to  
269 belong to the wealthiest quintile. When compared to the group of people who were not employed,  
270 those whose occupations involved agriculture or self-employment had a higher prevalence ratio  
271 for current smoking (APR: 1.42; 95% CI: 1.18-1.71).

272 **Table 3. Association between socio-demographic characteristics and non-communicable diseases risk factors identified from the mixed-effects Poisson regression model**

## 273 **Results of mean number NCD risk factors and multivariable** 274 **analysis of clustering of NCD risk factors**

275 We have examined the clustering of NCD risk factors (the number of risk factors present in an  
276 individual from 0 to 3) in our sample. **Table 4** shows that women of 40–49 years were more likely  
277 to experience non-communicable diseases risk factors than 18–29 years aged women (ARR:  
278 2.44; 95% CI: 2.22-2.68). Women with no education were at slightly higher risk for NCD risk  
279 factors (ARR: 1.15; 95% CI: 1.00-1.33) compared to the women with a higher level of education.  
280 In comparison with the never-married women, married (ARR: 2.32; 95% CI: 1.78–3.04), and  
281 widowed/divorced (ARR: 2.14; 95% CI: 1.59–2.89) were more prevalent in NCD risk factors.

282 **Table 4. Mean number of NCD risk factors and multivariable analysis (mixed-effects Poisson regression model) of clustering of NCD risk factors**

283 Individuals in the Barishal (ARR: 1.44; 95% CI: 1.28–1.63), Chattogram (ARR: 1.25; 95% CI:  
284 1.12–1.40), and Sylhet (ARR: 1.27; 95% CI: 1.12–1.43) divisions were living with somewhat  
285 higher risk factors of NCD compared to the individuals in Dhaka division. Likewise, women  
286 belonged to the middle (ARR: 1.25; 95% CI: 1.11–1.41), richer (ARR: 1.44; 95% CI: 1.27–1.63),  
287 and richest (ARR: 1.82; 95% CI: 1.60–2.07) were more likely to have the risk factors of NCD

288 compared to the poorest wealth quintile. Furthermore, the regression prevalence ratio plot also  
289 demonstrates the determinants of clustering of NCD risk factors (**Fig. 3**).

**Fig. 3. Regression prevalence ratio plot for the socio-demographic characteristics associated with NCD risk factors identified from the mixed-effects Poisson regression model**

290

## 291 Discussion

292 It is well established that NCD are increasing at an alarming rate [2,3]. Globally, the prevalence of  
293 NCD was reported much higher in women in comparison to men [2]. The scenario is not different  
294 for Bangladesh as well [32]. It has been reported that in recent years, the prevalence of NCD  
295 doubled in reproductive-aged women of LMICs [33]. So, our study attempted to investigate the  
296 prevalence and determinants of NCD risk factors among reproductive-aged women of Bangladesh  
297 by using the most recent nationally representative survey.

298 We found that the smoking, overweight/obesity, and hypertension rates were 9.55%, 31.57%, and  
299 20.27%, respectively, among reproductive-aged women. Our findings were similar to other  
300 previous study findings of Bangladesh that also reported similar rates of NCD risk factors  
301 [1,32,34,35]. The result of our study showed that the prevalence of smoking increased with age.  
302 The findings of our study were in line with the findings of a similar nationwide survey held in Nepal  
303 [36]. The high prevalence of smokers was reported commonly among women aged 40+ years,  
304 living in a rural area, illiterate, widowed/divorced, and with lower socio-economic status, which is  
305 similar to other studies [36–39]. Similar to previous studies, a three-fold higher prevalence of  
306 smoking among aged (30-40 years), divorced, and illiterate might be a reflection of coping  
307 strategies, and smoking might be an option to overcome their loneliness [40]. Bista et al. found in  
308 their study in Nepal that the proportion of tobacco usage was more than 2 times higher among 30-  
309 40 years aged women and nearly four times higher among 40+years women in comparison to 15-  
310 29 years women [36]. The trend was similar for our study as well. This might be due to the cultural

311 and socio-demographic similarities between Nepal and Bangladesh. Sreeramareddy et al. found  
312 similar results while comparing nationwide surveys in nine South-Asian countries, including  
313 Bangladesh and Nepal [41]. Respondents from urban areas reported being more smokers. This  
314 result is similar to the previous study conducted in Bangladesh [42]. Also, we have found that  
315 participants from Sylhet had reported more than 3 times higher smoking rates than Dhaka (capital).  
316 Similar area level variation was reported in a previous study conducted in Bangladesh [43].

317 We observed an increasing trend in overweight/obesity and hypertension with increasing age and  
318 wealth index, similar to Bista et al. [36]. Though hypertension steadily increased with age, the  
319 prevalence of overweight and obesity inconsistently increased with age. Women in the 30-39 years  
320 age group were reported to be more obese (40.26%), whereas 40-49 years aged women had the  
321 highest rate of hypertension (39.21%). However, the prevalence of overweight and obesity was  
322 twice in both aforementioned age groups compared to the 18-29 years age group, which is aligned  
323 with the findings of Khanam et al. [44]. The increasing trend of hypertension with age is also evident  
324 in another nationwide study in Bangladesh [45]. We observed education level has vice versa  
325 relation with hypertension and overweight & obesity. The hypertension rate was higher in the  
326 illiterate group, whereas the obesity rate was higher in people who had secondary education.  
327 Similar findings were described by Sun K. et al., who explained that participants with lower  
328 educational backgrounds have to involve in more physically active work than educated persons,  
329 which explained their lower rate of overweight and obesity [46]. This result also can be explained  
330 by the fact that the participants from the agriculture/self-employed group had a lower prevalence  
331 of overweight and obesity in our study. Obesity and hypertension both can endanger women's life  
332 during pregnancy, so these alarming conditions need to be addressed and should intervene  
333 policies.

334 We found that married women were more vulnerable to hypertension and prone to be obese than  
335 never-married women. Findings were supported by previous studies [36,44]. Taking birth control

336 methods might be an explanation for these findings [47,48]. Similar to other nationwide studies,  
337 we found that wealth index and geographical areas had a significant role in overweight/obesity and  
338 hypertension [44,45]. Obesity and hypertension both significantly increased with the wealth index.  
339 This positive association with the wealth index is a clear reflection of less physical activity due to  
340 their sedentary lifestyle. Though there was no significant difference between the residential  
341 distribution for both obesity and hypertension, similar to Chowdhury et al., we found that the highest  
342 hypertensive participants were reported from Rangpur, and the lowest was from Sylhet. Poverty,  
343 malnutrition, and salt intake patterns might be responsible for this variation [49,50].

344 We have also found that nearly 13% of the study population reported having two risk factors, which  
345 was similar to the findings of Biswas et al. [35]. We have seen that the clustering of NCD risk  
346 factors increased with age and wealth index. The finding of our study was aligned with the trend  
347 of increasing NCD risk factors found in previous studies from different countries, including  
348 Bangladesh [35,36]. Our study demonstrates that lower education is a potential confounder for  
349 NCD risk factors. However, it was inconsistent with the findings from other population-based  
350 studies of Bangladesh [11,51]. A specific study population with a specific age range might be  
351 responded differently from existing studies that resulted in the distribution of NCD risk factors  
352 among the respondents. Urbanization had no significant impact on NCD risk factors, though, in  
353 participants from Barishal, NCD risk factors were reported as approximately 1.5 times more than  
354 in Dhaka. Findings are similar to the research of Al-Zubayer et. al. [51].

355 Bangladesh has achieved the Millennium Development Goal-5 (MDG-5) [52]; however, the  
356 findings of this study demonstrate that reproductive-aged women are still in a vulnerable position.  
357 These findings indicate an alarming situation for NCD among reproductive-aged women in  
358 Bangladesh. It might be a barrier for us to achieving Sustainable Development Goal (SDG) [53].  
359 Preexisting NCD risk factors are well-established determinants for several adverse health  
360 outcomes, including maternal death [54]. Many adverse pregnancy outcomes are significantly

361 associated with obesity, hypertension, and the smoking status of mothers [55–57]. Considering  
362 the age of our study participants, these factors might be responsible for doubling the risk of  
363 unfavorable health conditions.

## 364 **Strength and Limitation**

365 This study is the first study in Bangladesh that investigated prevalence and determinants of NCD  
366 risk factors among reproductive-aged women. The major strength of our study is that it used a  
367 population-based, nationally representative data source. The BDHS covered rural and urban  
368 regions in all administrative divisions, making these findings generalizable to the country. Our  
369 mixed-effects Poisson regression corrects the overestimation of the effects size produced by  
370 conventional logistic regression employed in cross-sectional studies and increases the precision  
371 of the findings. Like the other studies, we had some limitations as well. As we used a secondary  
372 data source, we were only allowed to find out the associations between the dependent and  
373 independent variables. We failed to show any causal relationship. Secondly, the BDHS did not  
374 record other important clinical biomarkers (i.e., blood lipid profile, HbA1c, S. Creatinine), as well  
375 as behavioral factors (e.g., alcohol consumption, sleep duration), dietary factors (e.g., type and  
376 amount of food taken), physical activity, which are crucial risk factors for NCD. So, these data  
377 could not be included in the analyses, which limits the strength of this study.

## 378 **Conclusions**

379 There was a high prevalence of NCD risk factors among older women and who were currently  
380 married or widowed/divorced, from the wealthiest socio-economic groups, and with less  
381 education. Furthermore, the relationship between NCD risk factors and geographic location was  
382 found to be significant. Lessening the burden of non-communicable diseases necessitates  
383 effective disease prevention and control measures for women through reducing the burden of  
384 hypertension, overweight/obesity, and smoking. If the government does not address these risk



385 factors, women of reproductive age in Bangladesh will be at risk for poor health outcomes and it  
386 will be difficult to reach the sustainable development goal of reducing non-communicable  
387 diseases.

## 388 **Acknowledgments**

389 The authors thank MEASURE DHS (Demography and Health Surveys) for granting access to the  
390 BDHS 2017–2018 data.

391

## 392 **Supporting information**

393 Dataset of the study can be found in **S1 Data** file.

## 394 **References**

- 395 1. Chowdhury MZI, Rahman M, Akter T, Akhter T, Ahmed A, Shovon MA, et al. Hypertension  
396 prevalence and its trend in Bangladesh: evidence from a systematic review and meta-  
397 analysis. *Clinical Hypertension*. 2020;26. doi:10.1186/s40885-020-00143-1
- 398 2. World Health Organization (WHO). Noncommunicable diseases. 2021 [cited 16 Jul 2022].  
399 Available: <https://www.who.int/news-room/fact-sheets/detail/noncommunicable-diseases>
- 400 3. Bigna JJ, Noubiap JJ. The rising burden of non-communicable diseases in sub-Saharan  
401 Africa. *The Lancet Global Health*. 2019;7: e1295–e1296. doi:10.1016/S2214-  
402 109X(19)30370-5
- 403 4. Noncommunicable Diseases Progress Monitor 2020. [cited 14 Jul 2022]. Available:  
404 <https://www.who.int/publications/i/item/ncd-progress-monitor-2020>
- 405 5. Barua L, Chandra Banik P, Mohammed S, Islam S, Faruque M. Application of country-  
406 specific Globorisk score to estimate next 10 years risk of cardiovascular diseases and its  
407 associated predictors among postmenopausal rural women of Bangladesh: A cross-

- 408 sectional study in a primary care setting. *Lifestyle Medicine*. 2021;2: e32.  
409 doi:10.1002/LIM2.32
- 410 6. Ziaul M, Chowdhury I, Anik AM, Farhana Z, Bristi PD, Mamun BMA al, et al. Prevalence of  
411 metabolic syndrome in Bangladesh : a systematic review and meta- analysis of the studies.  
412 *BMC Public Health*. 2018;18: 1–14.
- 413 7. Chowdhury MZI, Haque MA, Farhana Z, Anik AM, Chowdhury AH, Haque SM, et al.  
414 Prevalence of cardiovascular disease among bangladeshi adult population: A systematic  
415 review and meta-analysis of the studies. *Vascular Health and Risk Management*. 2018;14:  
416 165–181. doi:10.2147/VHRM.S166111
- 417 8. Chowdhury SR. Cardiovascular health and COVID-19: A Bangladesh perspective. *Public  
418 Health Toxicology*. 2022;2: 1–2. doi:10.18332/PHT/148141
- 419 9. Budreviciute A, Damiati S, Sabir DK, Onder K, Schuller-Goetzburg P, Plakys G, et al.  
420 Management and Prevention Strategies for Non-communicable Diseases (NCDs) and  
421 Their Risk Factors. *Frontiers in Public Health*. 2020;8: 788.  
422 doi:10.3389/FPUBH.2020.574111/BIBTEX
- 423 10. Biswas T, Islam MS, Linton N, Rawal LB. Socio-Economic Inequality of Chronic Non-  
424 Communicable Diseases in Bangladesh. *PLOS ONE*. 2016;11: e0167140.  
425 doi:10.1371/JOURNAL.PONE.0167140
- 426 11. Zaman MM, Bhuiyan MR, Karim MN, MoniruzZaman, Rahman MM, Akanda AW, et al.  
427 Clustering of non-communicable diseases risk factors in Bangladeshi adults: An analysis  
428 of STEPS survey 2013. *BMC Public Health*. 2015;15: 1–9. doi:10.1186/S12889-015-1938-  
429 4/FIGURES/3
- 430 12. Gupta R das, al Kibria GM. Prevalence and associated factors of underweight, overweight,  
431 and obesity Among Bangladeshi adults: An analysis of demographic and health survey  
432 2017-18. *Obesity Medicine*. 2021;23: 100342. doi:10.1016/J.OBMED.2021.100342

- 433 13. Khan MN, Oldroyd JC, Chowdhury EK, Hossain MB, Rana J, Renzetti S, et al. Prevalence,  
434 awareness, treatment, and control of hypertension in Bangladesh: Findings from National  
435 Demographic and Health Survey, 2017–2018. *The Journal of Clinical Hypertension*.  
436 2021;23: 1830–1842. doi:10.1111/JCH.14363
- 437 14. Hossain MB, Khan MN, Oldroyd JC, Rana J, Magliago DJ, Chowdhury EK, et al.  
438 Prevalence of, and risk factors for, diabetes and prediabetes in Bangladesh: Evidence from  
439 the national survey using a multilevel Poisson regression model with a robust variance.  
440 Sarker AR, editor. *PLOS Global Public Health*. 2022;2: e0000461.  
441 doi:10.1371/JOURNAL.PGPH.0000461
- 442 15. Khuwaja AK, Kadir MM. Gender differences and clustering pattern of behavioural risk  
443 factors for chronic non-communicable diseases: Community-based study from a  
444 developing country. *Chronic Illness*. 2010;6: 163–170. doi:10.1177/1742395309352255
- 445 16. Gluckman PD, Hanson MA, Bateson P, Beedle AS, Law CM, Bhutta ZA, et al. Towards a  
446 new developmental synthesis: adaptive developmental plasticity and human disease. *The*  
447 *Lancet*. 2009;373: 1654–1657. doi:10.1016/S0140-6736(09)60234-8
- 448 17. Yaya S, Reddy KS, Belizán JM, Pingray V. Non-communicable diseases and reproductive  
449 health in sub-Saharan Africa: Bridging the policy-implementation gaps. *Reproductive*  
450 *Health*. 2020;17: 1–3. doi:10.1186/S12978-020-0857-8/METRICS
- 451 18. Rahman MM, Akter S, Jung J, Rahman MS, Sultana P. Trend, projection, and appropriate  
452 body mass index cut-off point for diabetes and hypertension in Bangladesh. *Diabetes*  
453 *Research and Clinical Practice*. 2017;126: 43–53. doi:10.1016/J.DIABRES.2017.01.008
- 454 19. Asogwa OA, Boateng D, Marzà-Florensa A, Peters S, Levitt N, van Olmen J, et al.  
455 Multimorbidity of non-communicable diseases in low-income and middle-income countries:  
456 a systematic review and meta-analysis. *BMJ Open*. 2022;12: 49133. doi:10.1136/bmjopen-  
457 2021-049133

- 458 20. Ferrer RL, Sibai BM, Mulrow CD, Chiquette E, Stevens KR, Cornell J. Management of mild  
459 chronic hypertension during pregnancy: a review. *Obstet Gynecol.* 2000;96: 849–860.  
460 doi:10.1016/S0029-7844(00)00938-8
- 461 21. Duckitt K, Harrington D. Risk factors for pre-eclampsia at antenatal booking: systematic  
462 review of controlled studies. *BMJ.* 2005;330: 565–567. doi:10.1136/BMJ.38380.674340.E0
- 463 22. Ahmed I, Ali SM, Amenga-Etego S, Ariff S, Bahl R, Baqui AH, et al. Population-based rates,  
464 timing, and causes of maternal deaths, stillbirths, and neonatal deaths in south Asia and  
465 sub-Saharan Africa: a multi-country prospective cohort study. *The Lancet Global Health.*  
466 2018;6: e1297–e1308. doi:10.1016/S2214-109X(18)30385-1/ATTACHMENT/365C35F3-  
467 5EFE-4F7D-9BEC-E916CB3CAE8B/MMC1.PDF
- 468 23. Zahangir M, Hasan M, Richardson A, Tabassum S. Malnutrition and non-communicable  
469 diseases among Bangladeshi women: an urban-rural comparison. *Nature Publishing*  
470 *Group.* 2017;7: 250. doi:10.1038/nutd.2017.2
- 471 24. Lim SS, Norman RJ, Davies MJ, Moran LJ. The effect of obesity on polycystic ovary  
472 syndrome: a systematic review and meta-analysis. *Obesity Reviews.* 2013;14: 95–109.  
473 doi:10.1111/J.1467-789X.2012.01053.X
- 474 25. DeVon HA, Ryan CJ, Ochs AL, Moshe S. Symptoms Across the Continuum of Acute  
475 Coronary Syndromes: Differences Between Women and Men. *Am J Crit Care.* 2008;17:  
476 14. doi:10.4037/ajcc2008.17.1.14
- 477 26. National Institute of Population Research and Training (NIPORT) and I. Bangladesh  
478 Demographic and Health Survey 2017-18. In: Dhaka, Bangladesh, and Rockville,  
479 Maryland, USA: NIPORT and ICF [Internet]. 2020 [cited 16 Jul 2022]. Available:  
480 <https://dhsprogram.com/publications/publication-FR344-DHS-Final-Reports.cfm>
- 481 27. Whitworth JA. 2003 World Health Organization (WHO)/International Society of  
482 Hypertension (ISH) statement on management of hypertension. *J Hypertens.* 2003;21:  
483 1983–1992. doi:10.1097/00004872-200311000-00002

- 484 28. Chobanian A v., Bakris GL, Black HR, Cushman WC, Green LA, Izzo JL, et al. The Seventh  
485 Report of the Joint National Committee on Prevention, Detection, Evaluation, and  
486 Treatment of High Blood Pressure: The JNC 7 Report. *JAMA*. 2003;289: 2560–2571.  
487 doi:10.1001/JAMA.289.19.2560
- 488 29. Barros AJD, Hirakata VN. Alternatives for logistic regression in cross-sectional studies: An  
489 empirical comparison of models that directly estimate the prevalence ratio. *BMC Medical*  
490 *Research Methodology*. 2003;3: 1–13. doi:10.1186/1471-2288-3-21/TABLES/9
- 491 30. Tamhane AR, Westfall AO, Burkholder GA, Cutter GR. Prevalence odds ratio versus  
492 prevalence ratio: choice comes with consequences. *Statistics in Medicine*. 2016;35: 5730–  
493 5735. doi:10.1002/SIM.7059
- 494 31. Yelland LN, Salter AB, Ryan P. Performance of the Modified Poisson Regression Approach  
495 for Estimating Relative Risks From Clustered Prospective Data. *American Journal of*  
496 *Epidemiology*. 2011;174: 984–992. doi:10.1093/AJE/KWR183
- 497 32. Fottrell E, Ahmed N, Shaha SK, Jennings H, Kuddus A, Morrison J, et al. Distribution of  
498 diabetes, hypertension and non-communicable disease risk factors among adults in rural  
499 Bangladesh: a cross-sectional survey. *BMJ Global Health*. 2018;3: e000787.  
500 doi:10.1136/BMJGH-2018-000787
- 501 33. Yaya S, Uthman OA, Ekholuenetale M, Bishwajit G. Socioeconomic Inequalities in the Risk  
502 Factors of Noncommunicable Diseases Among Women of Reproductive Age in Sub-  
503 saharan Africa: A Multi-Country Analysis of Survey Data. *Frontiers in Public Health*. 2018;6:  
504 307. doi:10.3389/FPUBH.2018.00307
- 505 34. Flora MS, Mascie-Taylor CGN, Rahman M. Gender and locality differences in tobacco  
506 prevalence among adult Bangladeshis. *Tobacco Control*. 2009;18: 445–450.  
507 doi:10.1136/TC.2008.028142
- 508 35. Biswas T, Townsend N, Islam MS, Islam MR, das Gupta R, Das SK, et al. Association  
509 between socioeconomic status and prevalence of non-communicable diseases risk factors

- 510 and comorbidities in Bangladesh: findings from a nationwide cross-sectional survey. *BMJ*  
511 *Open*. 2019;9: e025538. doi:10.1136/BMJOPEN-2018-025538
- 512 36. Bista B, Dhungana RR, Chalise B, Pandey AR. Prevalence and determinants of non-  
513 communicable diseases risk factors among reproductive aged women of Nepal: Results  
514 from Nepal Demographic Health Survey 2016. *PLOS ONE*. 2020;15: e0218840.  
515 doi:10.1371/JOURNAL.PONE.0218840
- 516 37. Palipudi KM, Sinha DN, Choudhury S, Zaman MM, Asma S, Andes L, et al. Predictors of  
517 tobacco smoking and smokeless tobacco use among adults in Bangladesh. *Indian J*  
518 *Cancer*. 2012;49: 387. doi:10.4103/0019-509X.107745
- 519 38. Nargis N, Thompson ME, Fong GT, Driezen P, Hussain AKMG, Ruthbah UH, et al.  
520 Prevalence and Patterns of Tobacco Use in Bangladesh from 2009 to 2012: Evidence from  
521 International Tobacco Control (ITC) Study. *PLoS ONE*. 2015;10.  
522 doi:10.1371/JOURNAL.PONE.0141135
- 523 39. Nath Khanal G, Khatri RB. Burden, prevention and control of tobacco consumption in  
524 Nepal: a narrative review of existing evidence. *International Health*. 2020;0: 1–12.  
525 doi:10.1093/inthealth/ihaa055
- 526 40. Dyal SR, Valente TW. A Systematic Review of Loneliness and Smoking: Small Effects, Big  
527 Implications. <https://doi.org/10.3109/1082608420151027933>. 2015;50: 1697–1716.  
528 doi:10.3109/10826084.2015.1027933
- 529 41. Sreeramareddy CT, Pradhan PMS, Mir IA, Sin S. Smoking and smokeless tobacco use in  
530 nine South and Southeast Asian countries: Prevalence estimates and social determinants  
531 from Demographic and Health Surveys. *Population Health Metrics*. 2014;12: 1–16.  
532 doi:10.1186/S12963-014-0022-0/TABLES/5
- 533 42. Khorshid Riaz B, Islam MZ, Islam S, Zaman MM, Hossain MA, Rahman MM, et al. Risk  
534 factors for non-communicable diseases in Bangladesh: findings of the population-based

- 535 cross-sectional national survey 2018. *BMJ Open*. 2020;10: 41334. doi:10.1136/bmjopen-  
536 2020-041334
- 537 43. Khan MMH, Khan A, Kraemer A, Mori M. Prevalence and correlates of smoking among  
538 urban adult men in Bangladesh: Slum versus non-slum comparison. *BMC Public Health*.  
539 2009;9: 1–12. doi:10.1186/1471-2458-9-149/TABLES/5
- 540 44. Khanam M, Osuagwu UL, Sanin KI, Haque MA, Rita RS, Agho KE, et al. Underweight,  
541 Overweight and Obesity among Reproductive Bangladeshi Women: A Nationwide Survey.  
542 *Nutrients*. 2021;13. doi:10.3390/NU13124408
- 543 45. Sathi NJ, Islam MA, Ahmed MS, Islam SMS. Prevalence, trends and associated factors of  
544 hypertension and diabetes mellitus in Bangladesh: Evidence from BHDS 2011 and 2017–  
545 18. *PLOS ONE*. 2022;17: e0267243. doi:10.1371/JOURNAL.PONE.0267243
- 546 46. Ali NB, Dibley MJ, Islam S, Rahman MM, Raihana S, Bhuiyan SET, et al. Overweight and  
547 obesity among urban women with iron deficiency anaemia in Bangladesh. *Maternal & Child*  
548 *Nutrition*. 2021;17. doi:10.1111/MCN.13102
- 549 47. Afshari M, Alizadeh-Navaei R, Moosazadeh M. Oral contraceptives and hypertension in  
550 women: results of the enrolment phase of Tabari Cohort Study. *BMC Women’s Health*.  
551 2021;21: 1–7. doi:10.1186/S12905-021-01376-4/TABLES/4
- 552 48. Linger Endalifer M, Diress G, Addisu A, Linger B. The association between combined oral  
553 contraceptive use and overweight/ obesity: a secondary data analysis of the 2016 Ethiopia  
554 Demographic and Health Survey. *BMJ Open*. 2020;10: 39229. doi:10.1136/bmjopen-2020-  
555 039229
- 556 49. Abdul Baker Chowdhury M, Uddin J, Haque R, Ibrahimou B. Hypertension among adults  
557 in Bangladesh: evidence from a national cross-sectional survey. 2016.  
558 doi:10.1186/s12872-016-0197-3

- 559 50. Thang NM, Popkin BM. ORIGINAL COMMUNICATION Patterns of food consumption in  
560 Vietnam: effects on socioeconomic groups during an era of economic growth. *European*  
561 *Journal of Clinical Nutrition*. 2004;58: 145–153. doi:10.1038/sj.ejcn.1601761
- 562 51. Al-Zubayer MA, Ahammed B, Sarder MA, Kundu S, Majumder UK, Islam SMS. Double and  
563 triple burden of non-communicable diseases and its determinants among adults in  
564 Bangladesh: Evidence from a recent demographic and health survey. *Int J Clin Pract*.  
565 2021;75. doi:10.1111/IJCP.14613
- 566 52. Chowdhury S, Banu LA, Chowdhury TA, Rubayet S, Khatoon S. Achieving Millennium  
567 Development Goals 4 and 5 in Bangladesh. *BJOG*. 2011;118: 36–46. doi:10.1111/j.1471-  
568 0528.2011.03111.x
- 569 53. Sustainable Development Goal 3: Good Health and Well-being | United Nations in  
570 Bangladesh. [cited 1 Jul 2022]. Available: <https://bangladesh.un.org/en/sdgs/3>
- 571 54. Storm F, Agampodi S, Eddleston M, Sørensen JB, Konradsen F, Rheinländer T. Indirect  
572 causes of maternal death. *The Lancet Global Health*. 2014;2: e566. doi:10.1016/S2214-  
573 109X(14)70297-9
- 574 55. Panaitescu AM, Syngelaki A, Prodan N, Akolekar R, Nicolaidis KH. Chronic hypertension  
575 and adverse pregnancy outcome: a cohort study. *Ultrasound Obstet Gynecol*. 2017;50:  
576 228–235. doi:10.1002/UOG.17493
- 577 56. Anderson TM, Lavista Ferres JM, You Ren S, Moon RY, Goldstein RD, Ramirez JM, et al.  
578 Maternal Smoking Before and During Pregnancy and the Risk of Sudden Unexpected  
579 Infant Death. *Pediatrics*. 2019;143. doi:10.1542/PEDS.2018-3325
- 580 57. Cedergren MI. Maternal morbid obesity and the risk of adverse pregnancy outcome. *Obstet*  
581 *Gynecol*. 2004;103: 219–224. doi:10.1097/01.AOG.0000107291.46159.00

582

583

584



585  
586

**Table 1. Socio-demographic characteristics of participants**

| <b>Variables</b>            | <b>Un-weighted count</b> | <b>Weighted percent/Mean (SD)</b> |
|-----------------------------|--------------------------|-----------------------------------|
| <b>Total</b>                | 5,624                    | 100.00                            |
| <b>Mean age (year)</b>      |                          | 31.00 (9.07)                      |
| <b>Age group (year)</b>     |                          |                                   |
| 18 – 29                     | 2,689                    | 48.26                             |
| 30 – 39                     | 1,716                    | 30.26                             |
| 40 – 49                     | 1,219                    | 21.48                             |
| <b>Educational status</b>   |                          |                                   |
| No education                | 957                      | 17.78                             |
| Primary                     | 1,691                    | 29.87                             |
| Secondary                   | 2,051                    | 37.68                             |
| Higher                      | 925                      | 14.67                             |
| <b>Marital status</b>       |                          |                                   |
| Never married               | 402                      | 6.33                              |
| Married                     | 4,902                    | 88.22                             |
| Widowed/divorced            | 320                      | 5.45                              |
| <b>Residence</b>            |                          |                                   |
| Rural                       | 3,533                    | 71.84                             |
| Urban                       | 2,091                    | 28.16                             |
| <b>Division</b>             |                          |                                   |
| Barishal                    | 590                      | 5.47                              |
| Chattogram                  | 827                      | 18.57                             |
| Dhaka                       | 799                      | 24.44                             |
| Khulna                      | 729                      | 11.69                             |
| Mymensingh                  | 589                      | 7.50                              |
| Rajshahi                    | 732                      | 14.24                             |
| Rangpur                     | 690                      | 11.62                             |
| Sylhet                      | 668                      | 6.46                              |
| <b>Wealth index</b>         |                          |                                   |
| Poorest                     | 1,069                    | 19.01                             |
| Poorer                      | 1,051                    | 19.50                             |
| Middle                      | 1,081                    | 19.90                             |
| Richer                      | 1,091                    | 19.56                             |
| Richest                     | 1,332                    | 22.02                             |
| <b>Occupational status*</b> |                          |                                   |
| Not working                 | 3,066                    | 54.38                             |
| Services                    | 242                      | 4.01                              |
| Agriculture/self-employed   | 1,667                    | 30.22                             |
| Manual                      | 641                      | 11.39                             |

\*8 cases missing

587  
588  
589  
590  
591  
592  
593  
594  
595  
596  
597  
598  
599  
600

601 **Table 2. Prevalence of non-communicable diseases risk factors among reproductive-aged women**  
602

| Variables                   | Current smoking |                        | Overweight and obesity |                        | Hypertension |                        |
|-----------------------------|-----------------|------------------------|------------------------|------------------------|--------------|------------------------|
|                             | n               | Prevalence, % (95% CI) | n                      | Prevalence, % (95% CI) | n            | Prevalence, % (95% CI) |
| <b>Total</b>                | 5,624           | 9.55 (8.65-10.53)      | 5603                   | 31.57 (30.17-33.02)    | 5624         | 20.27 (19.11-21.49)    |
| <b>Age group (year)</b>     |                 |                        |                        |                        |              |                        |
| 18 – 29                     | 2,689           | 4.28 (3.53-5.17)       | 2,679                  | 22.92 (21.11-24.82)    | 2,689        | 9.03 (7.87-10.33)      |
| 30 – 39                     | 1,716           | 11.06 (9.48 -12.86)    | 1,708                  | 40.26 (37.63-42.94)    | 1,716        | 24.77 (22.48-27.20)    |
| 40 – 49                     | 1,219           | 19.26 (16.69 -22.12)   | 1,216                  | 38.82 (35.91-41.82)    | 1,219        | 39.21 (36.16-42.35)    |
| <i>P-value</i>              |                 | <0.001                 |                        | <0.001                 |              | <0.001                 |
| <b>Educational status</b>   |                 |                        |                        |                        |              |                        |
| No education                | 957             | 19.69 (17.05-22.62)    | 952                    | 26.13 (23.26-29.21)    | 957          | 29.07 (25.92-32.43)    |
| Primary                     | 1,691           | 12.58 (10.95-14.41)    | 1,688                  | 30.75 (28.35-33.27)    | 1,691        | 22.29 (20.16-24.57)    |
| Secondary                   | 2,051           | 5.07 (4.17-6.15)       | 2,044                  | 33.81 (31.42-36.29)    | 2,051        | 17.14 (15.39-19.04)    |
| Higher                      | 925             | 2.60 (1.67-4.05)       | 919                    | 34.08 (30.44-37.92)    | 925          | 13.57 (11.33-16.17)    |
| <i>P-value</i>              |                 | <0.001                 |                        | 0.001                  |              | <0.001                 |
| <b>Marital status</b>       |                 |                        |                        |                        |              |                        |
| Never married               | 402             | 1.39 (0.53-3.57)       | 396                    | 10.43 (7.47-14.38)     | 402          | 6.18 (4.01-9.40)       |
| Married                     | 4,902           | 9.71 (8.78-10.73)      | 4,890                  | 33.36 (31.88-34.87)    | 4,902        | 20.95 (19.69-22.27)    |
| Widowed/divorced            | 320             | 16.41 (2.42-21.38)     | 317                    | 26.85 (21.57-32.87)    | 320          | 25.70 (20.60-31.56)    |
| <i>P-value</i>              |                 | <0.001                 |                        | <0.001                 |              | <0.001                 |
| <b>Residence</b>            |                 |                        |                        |                        |              |                        |
| Rural                       | 3,533           | 10.21 (9.11-11.42)     | 3,519                  | 28.20 (26.53-29.94)    | 3,533        | 19.92 (18.50-21.41)    |
| Urban                       | 2,091           | 7.87 (6.45-9.57)       | 2,084                  | 40.18 (37.63-42.78)    | 2,091        | 21.19 (19.21-23.31)    |
| <i>P-value</i>              |                 | 0.024                  |                        | <0.001                 |              | 0.317                  |
| <b>Division</b>             |                 |                        |                        |                        |              |                        |
| Barishal                    | 590             | 21.29 (17.65-25.45)    | 588                    | 29.28 (25.13-33.80)    | 590          | 24.24 (20.43-28.50)    |
| Chattogram                  | 827             | 8.62 (6.64-11.10)      | 824                    | 36.26 (32.57-40.11)    | 827          | 23.51 (20.71-26.57)    |
| Dhaka                       | 799             | 6.35 (4.77-8.41)       | 795                    | 35.73 (32.44-39.16)    | 799          | 16.90 (14.37-19.78)    |
| Khulna                      | 729             | 6.83 (4.77-9.70)       | 728                    | 35.45 (31.80-39.29)    | 729          | 20.47 (17.29-24.05)    |
| Mymensingh                  | 589             | 17.01 (13.72-20.89)    | 587                    | 24.69 (21.03-28.75)    | 589          | 15.76 (12.94-19.06)    |
| Rajshahi                    | 732             | 5.06 (3.24-7.82)       | 728                    | 28.13 (24.64-31.90)    | 732          | 20.62 (17.36-24.32)    |
| Rangpur                     | 690             | 8.92 (6.10-12.86)      | 689                    | 25.20 (21.89-28.83)    | 690          | 23.36 (20.51-26.48)    |
| Sylhet                      | 668             | 21.69 (17.73-26.24)    | 664                    | 24.40 (20.11-29.26)    | 668          | 18.93 (15.78-22.55)    |
| <i>P-value</i>              |                 | <0.001                 |                        | <0.001                 |              | 0.001                  |
| <b>Wealth index</b>         |                 |                        |                        |                        |              |                        |
| Poorest                     | 1,069           | 14.04 (11.72-16.75)    | 1,066                  | 16.48 (14.10-19.19)    | 1,069        | 17.35 (14.77-20.28)    |
| Poorer                      | 1,051           | 12.46 (10.43-14.81)    | 1,046                  | 21.74 (19.12-24.62)    | 1,051        | 18.84 (16.44-21.48)    |
| Middle                      | 1,081           | 8.37 (6.76-10.31)      | 1,080                  | 29.80 (26.82-32.97)    | 1,081        | 20.10 (17.66-22.78)    |
| Richer                      | 1,091           | 8.42 (6.80-10.39)      | 1,088                  | 34.59 (31.47-37.84)    | 1,091        | 21.39 (18.82-24.21)    |
| Richest                     | 1,332           | 5.16 (3.98-6.66)       | 1,323                  | 52.31 (49.24-55.37)    | 1,332        | 23.24 (20.81-25.86)    |
| <i>P-value</i>              |                 | <0.001                 |                        | <0.001                 |              | 0.019                  |
| <b>Occupational status*</b> |                 |                        |                        |                        |              |                        |
| Not working                 | 3,066           | 7.53 (6.53-8.67)       | 3,052                  | 34.35 (32.41-36.34)    | 3,066        | 20.19 (18.65-21.83)    |
| Services                    | 242             | 5.62 (3.15-9.85)       | 238                    | 35.18 (28.54-42.45)    | 242          | 20.76 (15.51-27.20)    |
| Agriculture/self-employed   | 1,667           | 14.49 (12.57-16.63)    | 1,667                  | 25.97 (23.85-28.20)    | 1,667        | 22.25 (20.03-24.63)    |
| Manual                      | 641             | 7.60 (5.33-10.72)      | 638                    | 32.46 (28.52-36.68)    | 641          | 15.56 (12.83-18.75)    |
| <i>P-value</i>              |                 | <0.001                 |                        | <0.001                 |              | 0.013                  |

603 \*8 cases missing

604  
605  
606  
607  
608  
609  
610

611 **Table 3. Association between socio-demographic characteristics and non-communicable diseases**  
 612 **risk factors identified from the mixed-effects Poisson regression model**  
 613

| Variables                  | Current smoking, APR | Overweight and obesity, APR | Hypertension, APR   |
|----------------------------|----------------------|-----------------------------|---------------------|
| <b>Age group (year)</b>    |                      |                             |                     |
| 18 – 29                    | Reference            | Reference                   | Reference           |
| 30 – 39                    | 1.83 (1.45-2.30)***  | 1.71 (1.55-1.89)***         | 2.58 (2.18-3.05)*** |
| 40 – 49                    | 2.65 (2.07-3.38)***  | 1.77 (1.57-1.98)***         | 3.94 (3.32-4.69)*** |
| <b>Educational status</b>  |                      |                             |                     |
| No education               | 3.19 (1.85-5.49)***  | 0.81 (0.69-0.97)*           | 1.33 (1.04-1.71)*   |
| Primary                    | 2.41 (1.43-4.04)**   | 0.98 (0.85-1.12)            | 1.27 (1.01-1.61)*   |
| Secondary                  | 1.45 (0.87-2.43)     | 1.04 (0.92-1.17)            | 1.23 (0.98-1.53)    |
| Higher                     | Reference            | Reference                   | Reference           |
| <b>Marital status</b>      |                      |                             |                     |
| Never married              | Reference            | Reference                   | Reference           |
| Married                    | 2.87 (1.10-7.52)*    | 2.71 (1.96-3.75)***         | 1.60 (1.02-2.51)*   |
| Widowed/divorced           | 3.32 (1.22-9.03)*    | 2.16 (1.49-3.15)***         | 1.53 (0.94-2.50)    |
| <b>Residence</b>           |                      |                             |                     |
| Rural                      | Reference            | Reference                   | Reference           |
| Urban                      | 1.23 (1.00-1.50)*    | 1.01 (0.92-1.10)            | 1.06 (0.94-1.21)    |
| <b>Division</b>            |                      |                             |                     |
| Barishal                   | 2.81 (2.04-3.86)***  | 1.07 (0.91-1.26)            | 1.50 (1.20-1.87)*** |
| Chattogram                 | 1.41 (1.00-1.98)*    | 1.11 (0.98-1.26)            | 1.45 (1.20-1.77)*** |
| Dhaka                      | Reference            | Reference                   | Reference           |
| Khulna                     | 0.91 (0.62-1.34)     | 1.11 (0.97-1.28)            | 1.18 (0.96-1.46)    |
| Mymensingh                 | 2.06 (1.47-2.90)***  | 0.93 (0.78-1.11)            | 1.02 (0.79-1.31)    |
| Rajshahi                   | 0.61 (0.40-0.92)*    | 1.01 (0.87-1.18)            | 1.27 (1.02-1.57)*   |
| Rangpur                    | 1.00 (0.68-1.46)     | 1.03 (0.87-1.22)            | 1.52 (1.23-1.89)*** |
| Sylhet                     | 3.07 (2.26-4.16)***  | 0.87 (0.74-1.02)            | 1.19 (0.96-1.49)    |
| <b>Wealth index</b>        |                      |                             |                     |
| Poorest                    | Reference            | Reference                   | Reference           |
| Poorer                     | 1.00 (0.81-1.24)     | 1.27 (1.05-1.54)*           | 1.08 (0.89-1.31)    |
| Middle                     | 0.79 (0.62-1.02)     | 1.67 (1.39-2.01)***         | 1.19 (0.98-1.44)    |
| Richer                     | 0.90 (0.68-1.17)     | 1.97 (1.64-2.36)***         | 1.36 (1.12-1.67)**  |
| Richest                    | 0.66 (0.46-0.94)*    | 2.88 (2.39-3.47)***         | 1.51 (1.22-1.87)*** |
| <b>Occupational status</b> |                      |                             |                     |
| Not working                | Reference            | Reference                   | Reference           |
| Services                   | 1.12 (0.63-2.00)     | 0.94 (0.77-1.14)            | 1.04 (0.78-1.38)    |
| Agriculture/self-employed  | 1.42 (1.18 -1.71)*** | 0.88 (0.79-0.98)*           | 0.91 (0.80-1.04)    |
| Manual                     | 0.94 (0.69-1.27)     | 1.00 (0.87-1.14)            | 0.76 (0.62-0.93)**  |

614 \*\*\*Significant at p-value < 0.001.

615 \*\*Significant at p-value < 0.01.

616 \*Significant at p-value < 0.05.

617  
618  
619  
620  
621  
622  
623  
624  
625  
626  
627  
628  
629  
630

631  
632  
633

**Table 4. Mean number of NCD risk factors and multivariable analysis (mixed-effects Poisson regression model) of clustering of NCD risk factors**

| <b>Variables</b>           | <b>Mean number (95% CI)</b> | <b>Clustering of NCD risk factors, APR</b> |
|----------------------------|-----------------------------|--------------------------------------------|
| <b>Age group (year)</b>    |                             |                                            |
| 18 – 29                    | 0.36 (0.34-0.39)            | Reference                                  |
| 30 – 39                    | 0.76 (0.72-0.80)            | 1.94 (1.78-2.11)***                        |
| 40 – 49                    | 0.97 (0.92-1.03)            | 2.44 (2.22-2.68)***                        |
| <b>Educational status</b>  |                             |                                            |
| No education               | 0.75 (0.69-0.80)            | 1.15 (1.00-1.33)*                          |
| Primary                    | 0.66 (0.61-0.70)            | 1.13 (1.00-1.29)*                          |
| Secondary                  | 0.56 (0.53-0.60)            | 1.09 (0.97-1.23)                           |
| Higher                     | 0.50 (0.45-0.55)            | Reference                                  |
| <b>Marital status</b>      |                             |                                            |
| Never married              | 0.18 (0.13-0.23)            | Reference                                  |
| Married                    | 0.64 (0.62-0.66)            | 2.32 (1.78-3.04)***                        |
| Widowed/divorced           | 0.69 (0.59-0.78)            | 2.14 (1.59-2.89)***                        |
| <b>Residence</b>           |                             |                                            |
| Rural                      | 0.58 (0.56-0.61)            | Reference                                  |
| Urban                      | 0.69 (0.65-0.73)            | 1.06 (0.99-1.14)                           |
| <b>Division</b>            |                             |                                            |
| Barishal                   | 0.75 (0.68-0.82)            | 1.44 (1.28-1.63)***                        |
| Chattogram                 | 0.68 (0.63-0.74)            | 1.25 (1.12-1.40)***                        |
| Dhaka                      | 0.59 (0.53-0.64)            | Reference                                  |
| Khulna                     | 0.63 (0.57-0.69)            | 1.10 (0.97-1.24)                           |
| Mymensingh                 | 0.58 (0.51-0.64)            | 1.13 (0.98-1.30)                           |
| Rajshahi                   | 0.54 (0.48-0.60)            | 1.02 (0.90-1.16)                           |
| Rangpur                    | 0.58 (0.52-0.63)            | 1.15 (1.01-1.32)*                          |
| Sylhet                     | 0.65 (0.58-0.72)            | 1.27 (1.12-1.43)***                        |
| <b>Wealth index</b>        |                             |                                            |
| Poorest                    | 0.48 (0.43-0.53)            | Reference                                  |
| Poorer                     | 0.53 (0.48-0.58)            | 1.11 (0.99-1.26)                           |
| Middle                     | 0.58 (0.54-0.63)            | 1.25 (1.11-1.41)***                        |
| Richer                     | 0.64 (0.59-0.69)            | 1.44 (1.27-1.63)***                        |
| Richest                    | 0.81 (0.76-0.85)            | 1.82 (1.60-2.07)***                        |
| <b>Occupational status</b> |                             |                                            |
| Not working                | 0.62 (0.59-0.65)            | Reference                                  |
| Services                   | 0.62 (0.50-0.73)            | 0.99 (0.83-1.18)                           |
| Agriculture/self-employed  | 0.63 (0.59-0.67)            | 0.98 (0.90-1.06)                           |
| Manual                     | 0.55 (0.49-0.61)            | 0.90 (0.80-1.01)                           |

\*\*\*Significant at p-value < 0.001.

\*\*Significant at p-value < 0.01.

\*Significant at p-value < 0.05.

634  
635  
636  
637  
638  
639  
640  
641  
642  
643  
644  
645  
646  
647  
648

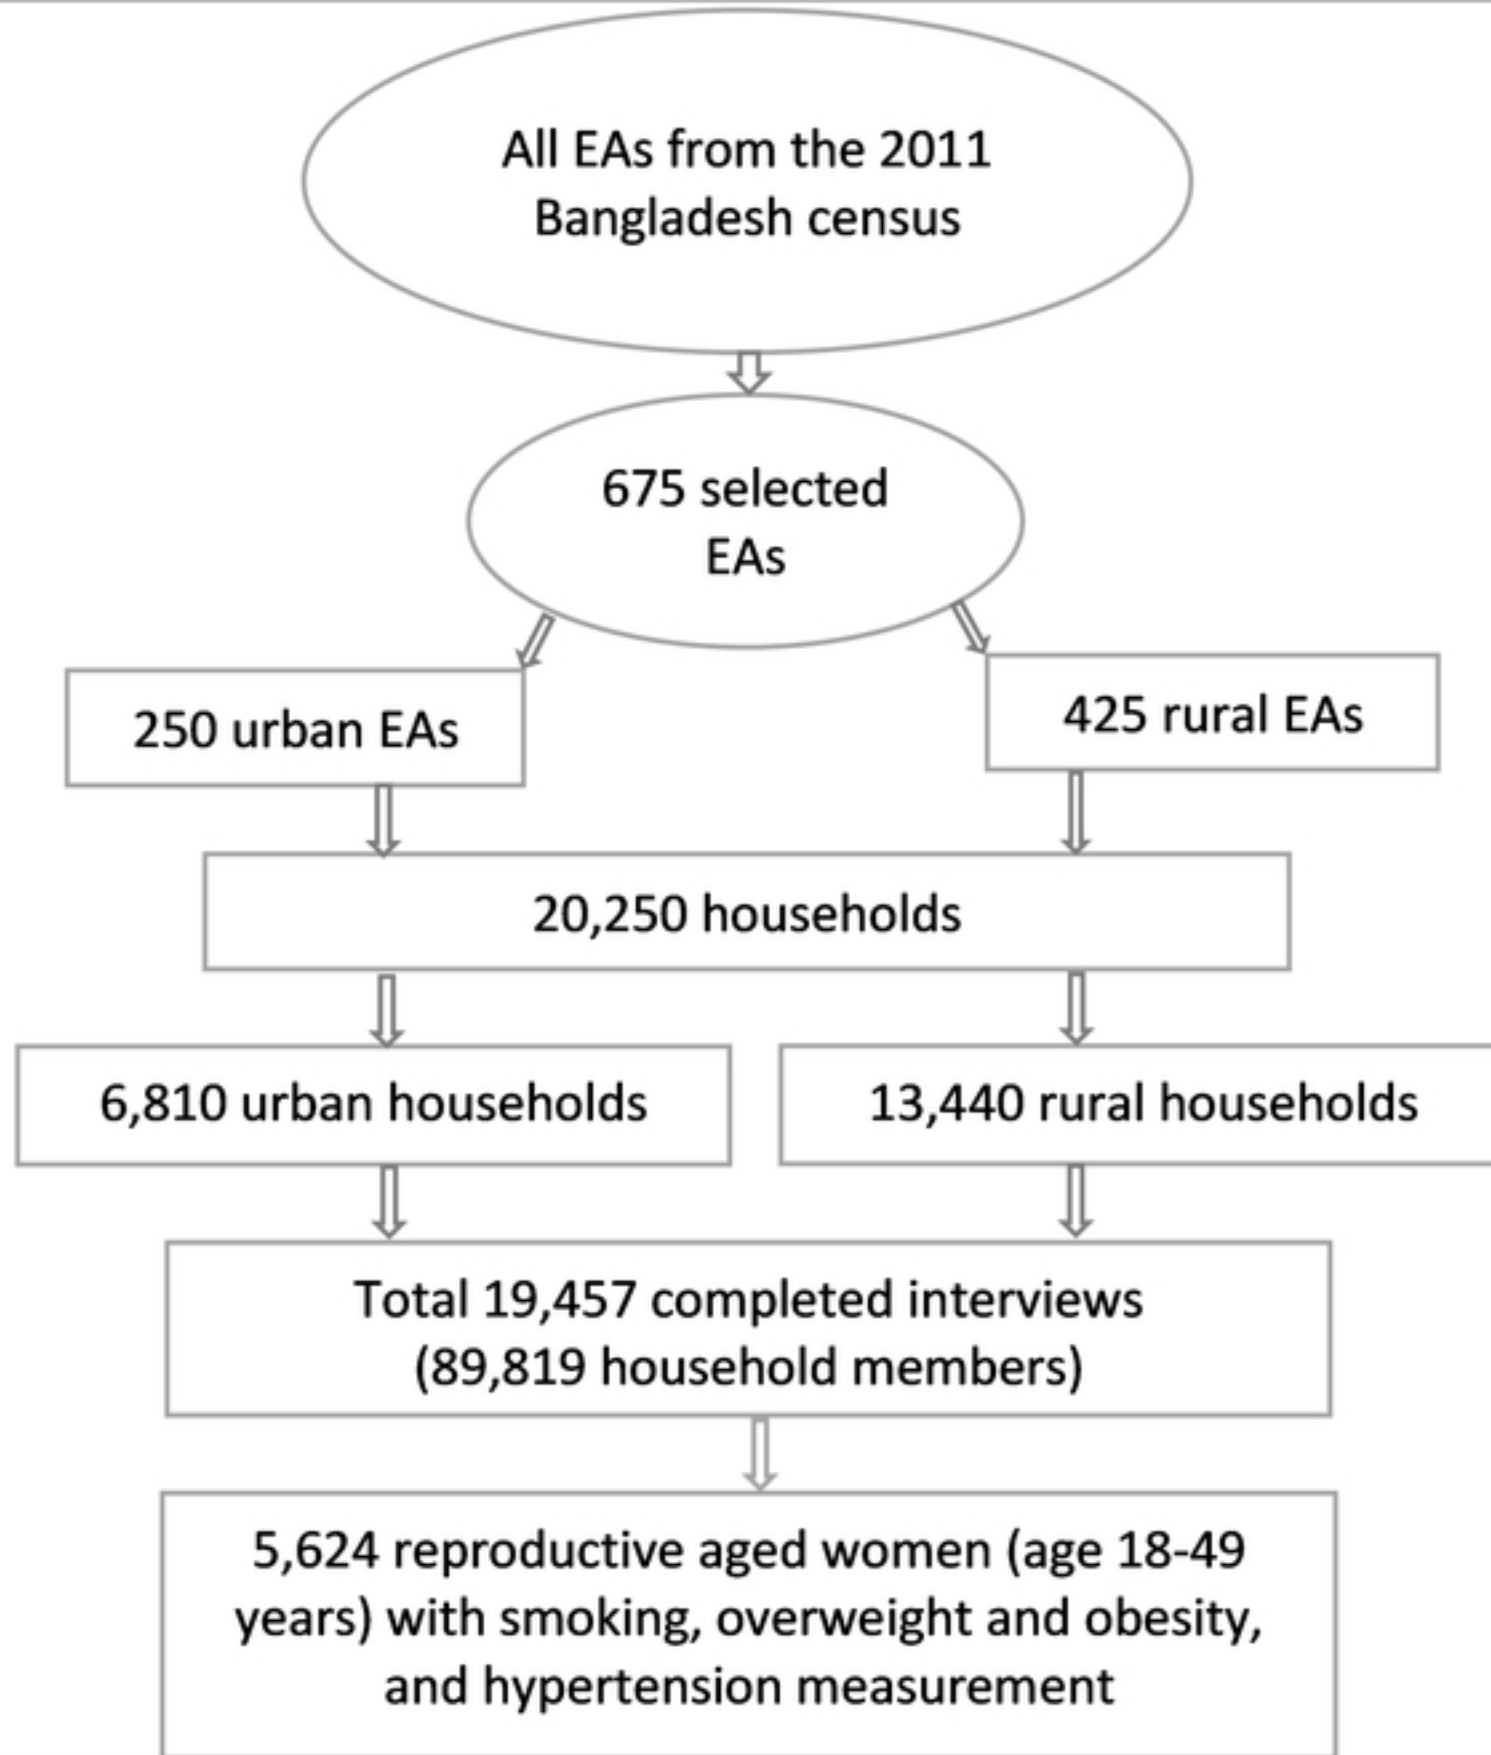

Figure

# Number of risk factors

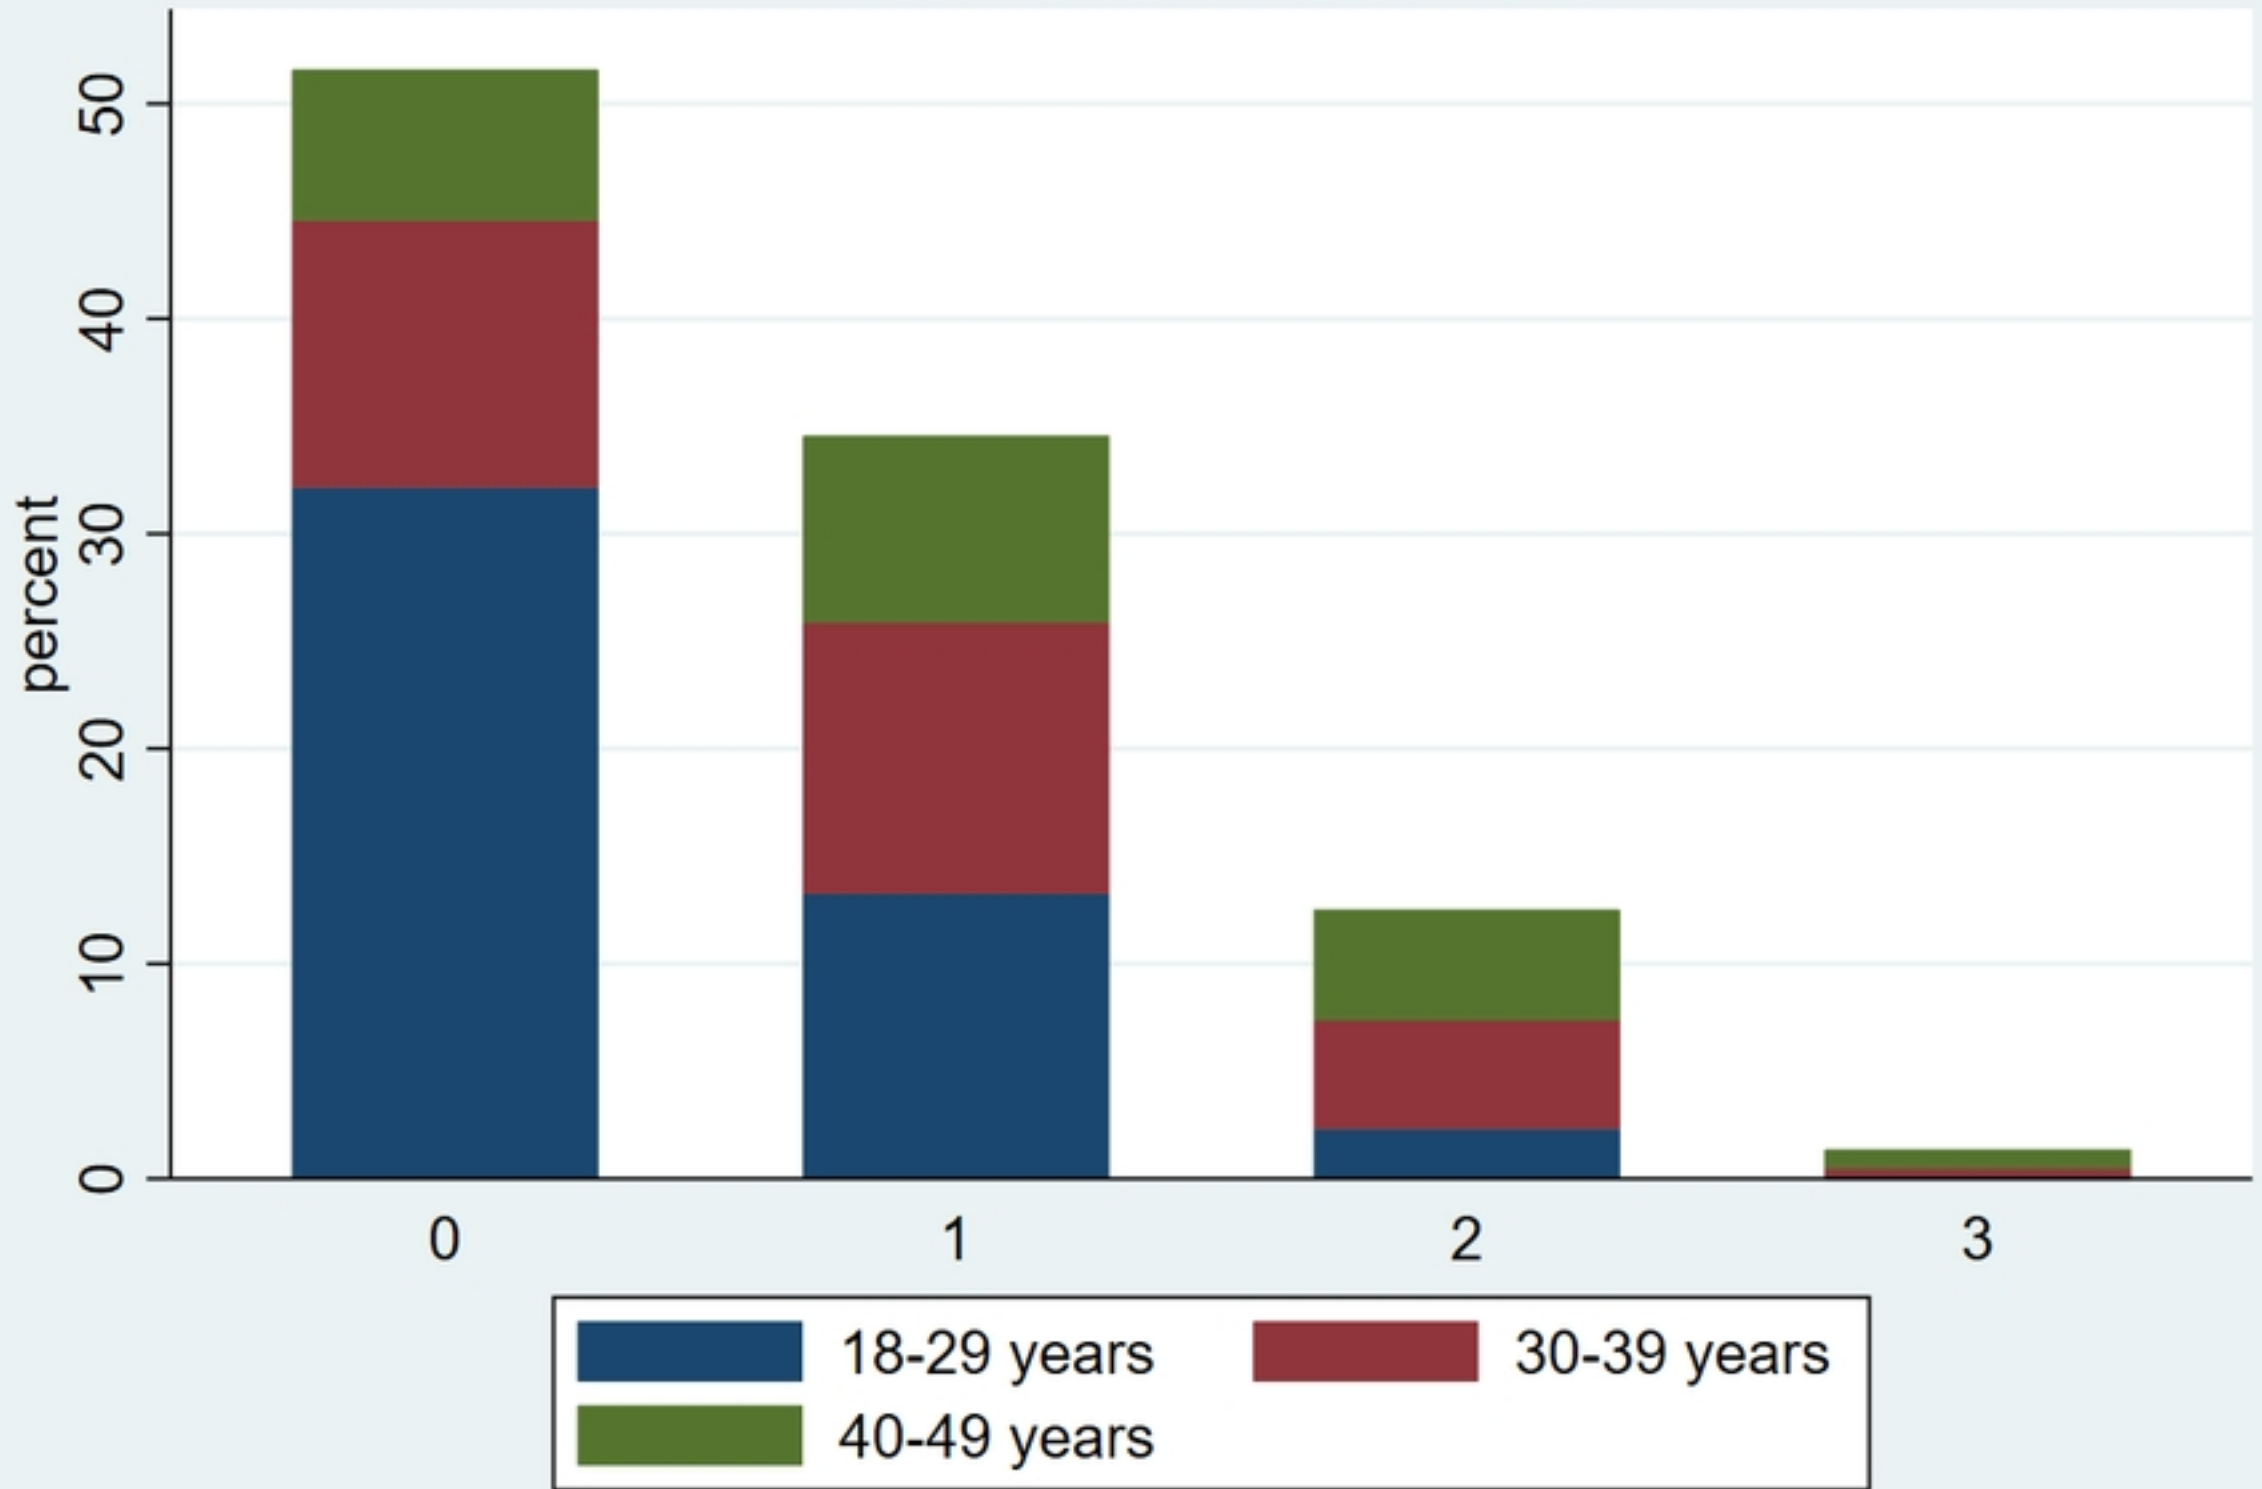

Figure

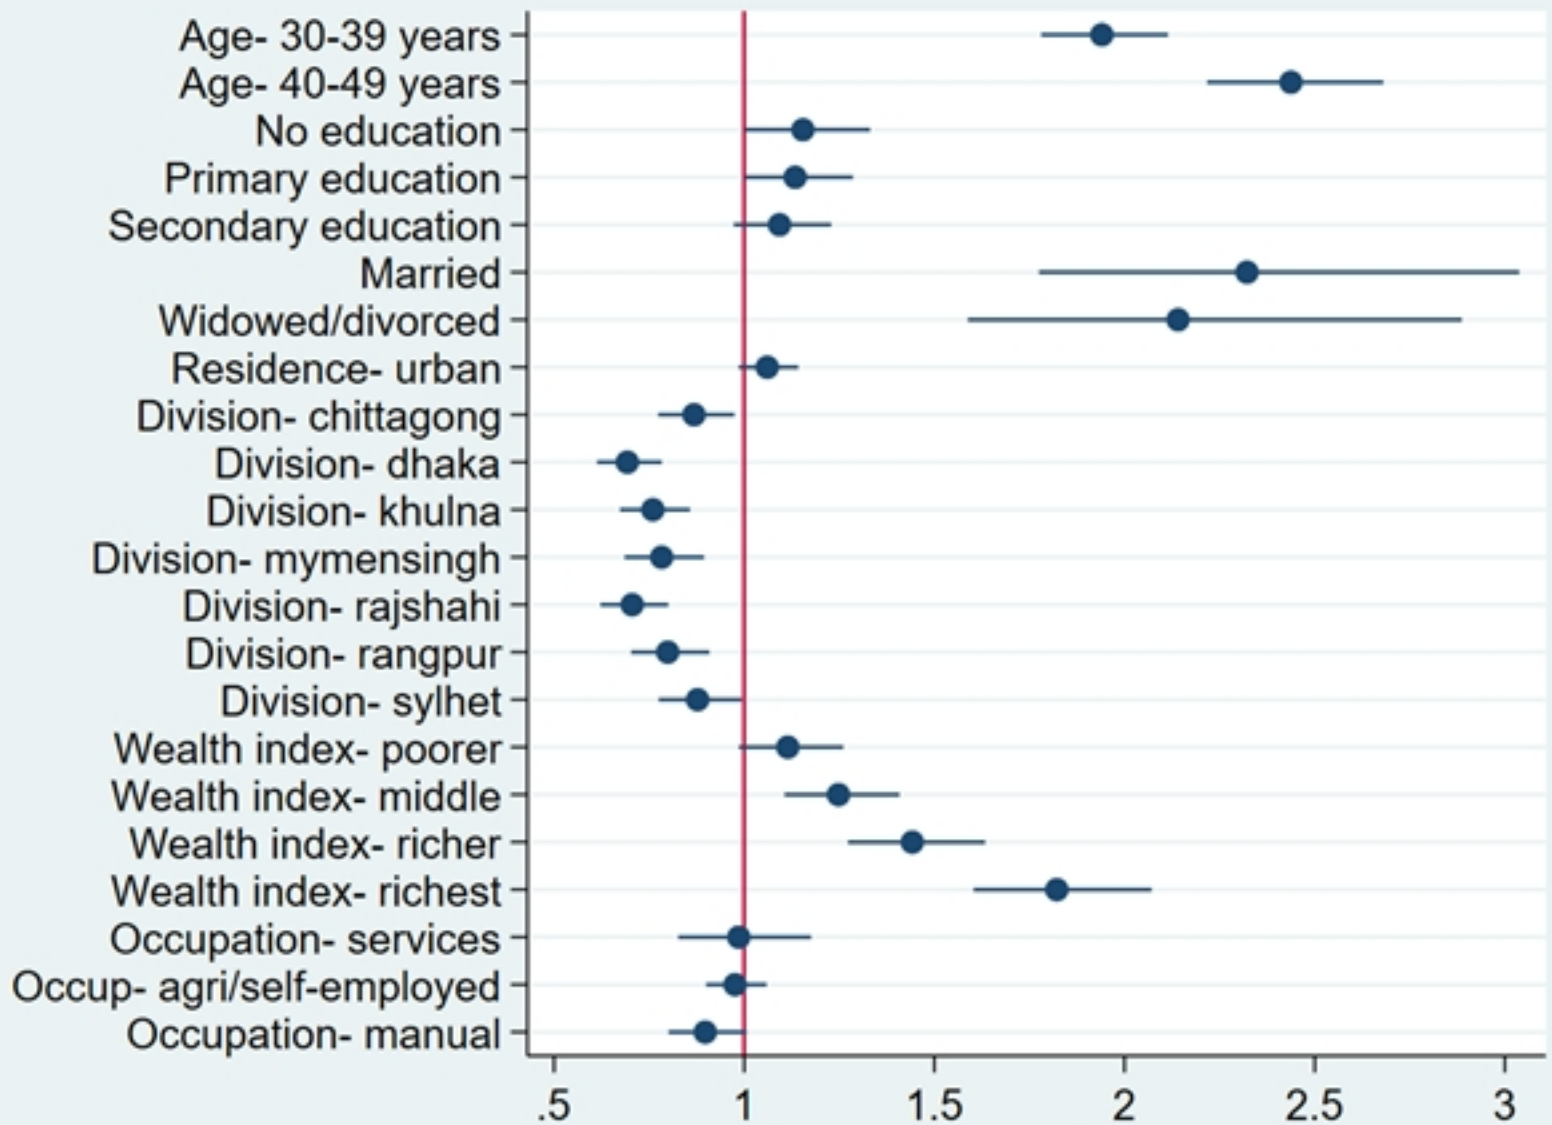

Figure
